# Supplementary material
Source: PubMed Central journal article supplement (PMC11114558)
Supplement: 18_2012_1055_MOESM2_ESM.pdf [file 18_2012_1055_MOESM2_ESM.pdf]

Suppl. Fig. 2

fold changes to reference sample(s)  
 array deviations between samples and reference samples  
 bead standard errors between sample and reference sample

| Selected Genes  | fold changes to siGFP |                  |                 |            | Reference    |               |       |            | Probe        |               |       |              | Genebank Acc No |
|-----------------|-----------------------|------------------|-----------------|------------|--------------|---------------|-------|------------|--------------|---------------|-------|--------------|-----------------|
|                 | resul                 | Array Stdev Diff | Bead Stdev Diff | Avg signal | Bead Std Err | Array Std Dev | p-val | Avg signal | Bead Std Err | Array Std Dev | p-val |              |                 |
| TFMRF511B       | 2.8                   | 3.0              | 10.8            | 140.3      | 9.1          | 14.7          | 0.002 | 389.5      | 17.9         | 13.9          | 0.000 | NM_002546    |                 |
| SNORA22         | 2.7                   | 9.4              | 9.8             | 329.4      | 20.7         | 12.6          | 0.000 | 904.2      | 38.0         | 48.4          | 0.000 | NR_002324    |                 |
| TF12            | 2.7                   | 5.6              | 13.4            | 189.2      | 8.3          | 12.4          | 0.001 | 536.1      | 15.8         | 38.2          | 0.000 | NM_006528    |                 |
| CP              | 2.7                   | 4.3              | 13.2            | 131.1      | 5.7          | 20.3          | 0.002 | 349.0      | 30.6         | 30.6          | 0.000 | NM_000096    |                 |
| F3              | 2.4                   | 5.1              | 11.9            | 167.3      | 29.9         | 177.5         | 0.000 | 1651.8     | 51.9         | 14.5          | 0.000 | NM_001993    |                 |
| SNORA7B         | 2.4                   | 6.8              | 11.0            | 167.9      | 7.3          | 12.1          | 0.001 | 402.2      | 12.3         | 72.5          | 0.000 | NR_002962    |                 |
| GBP5            | 2.3                   | 7.0              | 9.8             | 84.5       | 4.2          | 8.3           | 0.012 | 194.2      | 6.9          | 7.3           | 0.001 | NM_025242    |                 |
| HIST1H1C        | 2.3                   | 9.7              | 10.7            | 1403.9     | 68.1         | 56.2          | 0.000 | 3174.5     | 96.6         | 126.0         | 0.000 | NM_005319    |                 |
| INDC            | 2.2                   | 2.9              | 9.7             | 151.6      | 7.9          | 18.3          | 0.001 | 339.1      | 11.5         | 45.3          | 0.000 | NM_002164    |                 |
| RFL32           | 2.2                   | 7.3              | 10.3            | 141.3      | 5.8          | 3.1           | 0.002 | 314.3      | 11.0         | 20.5          | 0.000 | NM_001007074 |                 |
| MALL            | 2.2                   | 6.0              | 11.0            | 239.3      | 11.8         | 8.9           | 0.000 | 525.6      | 14.3         | 38.8          | 0.000 | NM_003434    |                 |
| FLJ02186        | 2.2                   | 3.0              | 11.2            | 542.2      | 20.7         | 11.9          | 0.000 | 1171.7     | 35.3         | 139.6         | 0.000 | NM_017702    |                 |
| LIPC            | 2.2                   | 8.2              | 10.5            | 446.5      | 21.9         | 31.4          | 0.000 | 961.5      | 27.0         | 31.4          | 0.000 | NM_000236    |                 |
| HIST1H2BK       | 2.1                   | 7.5              | 12.3            | 1349.7     | 46.4         | 48.5          | 0.000 | 2880.3     | 78.1         | 154.3         | 0.000 | NM_080593    |                 |
| CAMKB2          | 2.1                   | 10.8             | 11.1            | 203.0      | 6.6          | 0.7           | 0.001 | 431.7      | 14.0         | 20.4          | 0.000 | NM_172081    |                 |
| HIST1H2BD       | 2.1                   | 21.4             | 9.1             | 537.3      | 26.4         | 2.8           | 0.000 | 1122.4     | 38.2         | 24.8          | 0.000 | NM_021063    |                 |
| RPL13           | 2.1                   | 18.9             | 8.9             | 236.1      | 13.7         | 11.1          | 0.000 | 489.0      | 14.7         | 2.2           | 0.000 | NM_033251    |                 |
| ADH1C           | 2.1                   | 15.4             | 9.2             | 456.4      | 15.2         | 1.2           | 0.000 | 134.4      | 5.0          | 3.3           | 0.003 | NM_000669    |                 |
| CD55            | 2.0                   | 72.4             | 11.6            | 717.7      | 26.0         | 5.5           | 0.000 | 1470.8     | 38.8         | 4.9           | 0.000 | NM_000574    |                 |
| BRP44L          | 2.0                   | 7.1              | 10.6            | 230.7      | 8.9          | 8.4           | 0.000 | 472.5      | 14.0         | 25.5          | 0.000 | NM_018098    |                 |
| VGX             | 2.0                   | 7.0              | 9.4             | 102.2      | 3.2          | 3.2           | 0.006 | 207.5      | 6.9          | 11.7          | 0.001 | NM_013452    |                 |
| WNT7A           | 2.0                   | 8.5              | 12.3            | 610.8      | 18.9         | 11.7          | 0.000 | 1236.6     | 32.1         | 62.3          | 0.000 | NM_004625    |                 |
| MGC13057        | 2.0                   | 5.3              | 8.9             | 737.3      | 31.6         | 63.2          | 0.000 | 1490.8     | 52.7         | 78.9          | 0.000 | NM_001042521 |                 |
| HIST1H2BD       | 2.0                   | 13.5             | 9.6             | 780.9      | 37.0         | 20.6          | 0.000 | 1599.7     | 46.5         | 39.1          | 0.000 | NM_138720    |                 |
| LOC28297        | 2.0                   | 8.0              | 8.4             | 101.4      | 3.5          | 6.3           | 0.006 | 201.3      | 8.5          | 6.3           | 0.001 | XM_372109    |                 |
| APOOL           | 2.0                   | 11.0             | 9.1             | 347.0      | 16.2         | 15.3          | 0.000 | 685.5      | 21.1         | 15.5          | 0.000 | NM_198450    |                 |
| FLJ42410        | 2.0                   | 3.0              | 11.1            | 202.0      | 15.2         | 91.6          | 0.000 | 4405.0     | 112.7        | 616.2         | 0.000 | NM_016619    |                 |
| WDR8            | 1.9                   | 13.5             | 10.0            | 456.6      | 15.9         | 0.7           | 0.000 | 889.2      | 15.3         | 11.3          | 0.000 | NM_001003725 |                 |
| TERC            | 1.9                   | 3.1              | 7.4             | 111.3      | 6.7          | 18.6          | 0.003 | 214.3      | 7.1          | 15.0          | 0.001 | NR_001566    |                 |
| WDR25           | 1.9                   | 2.8              | 10.5            | 705.3      | 25.3         | 91.6          | 0.000 | 1352.0     | 36.5         | 139.3         | 0.000 | NM_004515    |                 |
| C10orf116       | 1.9                   | 2.9              | 9.9             | 182.5      | 8.9          | 14.0          | 0.001 | 376.6      | 11.3         | 48.1          | 0.000 | NM_008829    |                 |
| LOC644100       | 1.9                   | 97.0             | 7.3             | 93.8       | 4.9          | 0.8           | 0.008 | 178.6      | 6.7          | 0.1           | 0.001 | XM_527327    |                 |
| HSS11           | 1.9                   | 3.1              | 7.8             | 167.2      | 8.2          | 6.1           | 0.001 | 317.8      | 11.1         | 42.4          | 0.000 | NM_005114    |                 |
| ORF1            | 1.9                   | 6.1              | 9.7             | 115.3      | 4.5          | 5.1           | 0.002 | 219.0      | 6.7          | 10.8          | 0.001 | NM_004750    |                 |
| HRA5            | 1.9                   | 2.7              | 10.8            | 108.1      | 24.3         | 51.0          | 0.000 | 1290.0     | 32.0         | 178.0         | 0.000 | NM_005343    |                 |
| GPR110          | 1.9                   | 3.6              | 8.6             | 106.4      | 4.7          | 5.2           | 0.004 | 204.5      | 6.5          | 21.6          | 0.001 | NM_153940    |                 |
| C14orf151       | 1.9                   | 4.2              | 9.2             | 389.4      | 10.4         | 74.7          | 0.000 | 747.3      | 23.8         | 39.3          | 0.000 | NM_032714    |                 |
| LOC644100       | 1.9                   | 3.7              | 8.2             | 88.2       | 3.9          | 3.7           | 0.009 | 164.9      | 5.4          | 10.0          | 0.001 | NM_937388    |                 |
| IMP4            | 1.9                   | 2.9              | 9.1             | 899.3      | 40.5         | 44.1          | 0.000 | 1674.9     | 45.1         | 220.6         | 0.000 | NM_033416    |                 |
| LOC389816       | 1.9                   | 2.2              | 10.2            | 151.2      | 21.2         | 28.1          | 0.000 | 281.0      | 15.8         | 32.0          | 0.000 | NM_0013653   |                 |
| MSX1            | 1.8                   | 16.7             | 10.4            | 1030.6     | 41.7         | 40.0          | 0.000 | 1884.1     | 40.6         | 11.0          | 0.000 | NM_022448    |                 |
| HIST1H2AC       | 1.8                   | 5.2              | 7.5             | 190.9      | 8.6          | 3.9           | 0.001 | 349.0      | 12.6         | 26.3          | 0.000 | NM_003512    |                 |
| GPR110          | 1.8                   | 8.6              | 8.0             | 255.9      | 19.0         | 1.9           | 0.002 | 156.4      | 5.3          | 6.2           | 0.000 | NM_005438    |                 |
| BR3BP           | 1.8                   | 2.8              | 8.0             | 360.3      | 18.0         | 19.2          | 0.000 | 653.3      | 18.6         | 84.0          | 0.000 | NM_080626    |                 |
| FLJ20186        | 1.8                   | 4.9              | 6.9             | 285.9      | 18.0         | 31.0          | 0.000 | 518.1      | 15.7         | 16.8          | 0.000 | NM_017702    |                 |
| LOC244108       | 1.8                   | 4.4              | 10.0            | 420.2      | 22.9         | 22.9          | 0.000 | 756.3      | 20.8         | 49.7          | 0.000 | NM_097029    |                 |
| RPS19BP1        | 1.8                   | 3.9              | 7.9             | 541.1      | 26.1         | 60.0          | 0.000 | 971.3      | 28.2         | 50.2          | 0.000 | NM_194326    |                 |
| PNMT            | 1.8                   | 14.0             | 7.9             | 75.7       | 29.7         | 74.0          | 0.000 | 1346.4     | 48.0         | 18.2          | 0.000 | NM_002686    |                 |
| RPL5            | 1.8                   | 5.8              | 7.6             | 365.3      | 15.6         | 25.0          | 0.000 | 650.1      | 21.1         | 31.2          | 0.000 | NM_033301    |                 |
| THOC4           | 1.8                   | 5.9              | 7.7             | 1024.5     | 48.8         | 113.9         | 0.000 | 1817.1     | 43.7         | 20.1          | 0.000 | XM_001134346 |                 |
| MEID10          | 1.8                   | 4.4              | 8.1             | 1095.6     | 60.5         | 21.6          | 0.000 | 1939.0     | 53.8         | 17.8          | 0.000 | NM_032286    |                 |
| HIST1H2BJ       | 1.8                   | 5.1              | 10.0            | 255.8      | 15.2         | 21.6          | 0.000 | 452.4      | 17.2         | 17.2          | 0.000 | NM_010569    |                 |
| TGM2            | 1.8                   | 21.3             | 9.5             | 638.9      | 20.9         | 6.9           | 0.000 | 1124.2     | 30.4         | 11.8          | 0.000 | NM_198951    |                 |
| C2orf49         | 1.7                   | 3.7              | 6.7             | 442.9      | 27.3         | 41.9          | 0.000 | 774.1      | 21.7         | 61.0          | 0.000 | NM_024093    |                 |
| SOCS7           | 1.7                   | 3.1              | 7.1             | 88.4       | 3.2          | 2.7           | 0.009 | 153.2      | 5.9          | 19.0          | 0.000 | NM_014598    |                 |
| RFL32           | 1.7                   | 3.3              | 7.0             | 360.3      | 16.2         | 18.9          | 0.000 | 564.8      | 15.1         | 11.1          | 0.000 | NM_015414    |                 |
| HIALT2          | 1.7                   | 4.6              | 7.8             | 428.2      | 13.2         | 39.5          | 0.000 | 740.3      | 27.0         | 32.6          | 0.000 | NR_002894    |                 |
| TAF1170         | 1.7                   | 11.2             | 6.7             | 499.8      | 22.1         | 25.6          | 0.000 | 866.8      | 32.6         | 6.7           | 0.000 | NM_005243    |                 |
| LAMA3           | 1.7                   | 10.1             | 6.9             | 925.5      | 49.3         | 49.3          | 0.000 | 1958.2     | 37.3         | 7.7           | 0.000 | NM_000227    |                 |
| LMO4            | 1.7                   | 11.5             | 7.7             | 686.1      | 31.9         | 33.9          | 0.000 | 1183.4     | 30.0         | 9.2           | 0.000 | NM_006769    |                 |
| UBFD1           | 1.7                   | 2.5              | 7.8             | 381.4      | 16.6         | 48.5          | 0.000 | 657.9      | 18.9         | 61.8          | 0.000 | NM_019116    |                 |
| SH3BPGLR3       | 1.7                   | 6.3              | 8.0             | 120.6      | 67.7         | 120.6         | 0.000 | 3661.9     | 86.9         | 128.6         | 0.000 | NM_005438    |                 |
| FOSL1           | 1.7                   | 4.0              | 7.9             | 617.7      | 20.9         | 90.4          | 0.000 | 1063.2     | 29.9         | 19.9          | 0.000 | NM_005438    |                 |
| FBOX6           | 1.7                   | 7.1              | 7.0             | 251.5      | 12.0         | 9.3           | 0.000 | 432.6      | 13.9         | 16.3          | 0.000 | NM_018426    |                 |
| RAD             | 1.7                   | 4.0              | 6.0             | 100.1      | 3.9          | 4.8           | 0.007 | 171.7      | 6.1          | 6.8           | 0.000 | NM_024109    |                 |
| C16orf88        | 1.7                   | 7.9              | 7.6             | 507.0      | 21.2         | 1.7           | 0.000 | 868.5      | 24.6         | 44.2          | 0.000 | NM_033211    |                 |
| ZFAND2          | 1.7                   | 3.5              | 7.9             | 633.1      | 24.5         | 28.1          | 0.000 | 1080.4     | 32.4         | 99.4          | 0.000 | NM_033211    |                 |
| RRAGD           | 1.7                   | 5.2              | 7.4             | 646.4      | 24.2         | 0.2           | 0.000 | 1100.6     | 36.0         | 33.2          | 0.000 | NM_024241    |                 |
| LOC650298       | 1.7                   | 2.8              | 7.4             | 248.2      | 10.3         | 3.3           | 0.000 | 421.8      | 13.1         | 53.0          | 0.000 | NM_021244    |                 |
| UGT2B7          | 1.7                   | 4.0              | 6.0             | 690.0      | 20.9         | 28.9          | 0.000 | 1173.6     | 34.3         | 33.2          | 0.000 | NM_939387    |                 |
| KRT24           | 1.7                   | 2.8              | 7.5             | 74.8       | 2.8          | 3.3           | 0.040 | 125.5      | 4.0          | 14.7          | 0.003 | NM_019016    |                 |
| AHNAK           | 1.7                   | 2.9              | 7.1             | 146.3      | 6.1          | 6.7           | 0.001 | 246.6      | 8.0          | 27.6          | 0.000 | NM_024090    |                 |
| SOCS7           | 1.7                   | 3.2              | 7.0             | 101.7      | 3.3          | 8.5           | 0.003 | 170.1      | 4.1          | 4.2           | 0.000 | NM_014598    |                 |
| UGT2B7          | 1.7                   | 8.2              | 7.2             | 557.1      | 24.4         | 29.8          | 0.000 | 929.1      | 30.4         | 16.7          | 0.000 | NM_001074    |                 |
| STR1A3          | 1.7                   | 3.9              | 8.2             | 1111.4     | 48.2         | 14.3          | 0.000 | 1852.3     | 41.6         | 175.2         | 0.000 | NM_144988    |                 |
| MYP151          | 1.7                   | 5.7              | 8.6             | 450.6      | 15.6         | 20.9          | 0.000 | 800.9      | 24.8         | 20.8          | 0.000 | NM_001434    |                 |
| THRAP6          | 1.7                   | 3.7              | 8.0             | 1429.7     | 48.1         | 101.5         | 0.000 | 2369.5     | 69.2         | 160.8         | 0.000 | NM_080651    |                 |
| HIST2H2AC       | 1.6                   | 6.1              | 7.2             | 742.7      | 32.3         | 70.6          | 0.000 | 1222.3     | 33.9         | 8.2           | 0.000 | NM_003517    |                 |
| DKFZP594J0863   | 1.6                   | 15.0             | 6.9             | 1052.7     | 51.6         | 41.6          | 0.000 | 1731.7     | 47.4         | 6.6           | 0.000 | NM_004566    |                 |
| PKFKF3          | 1.6                   | 19.1             | 7.0             | 314.2      | 14.5         | 3.7           | 0.000 | 511.6      | 13.6         | 6.7           | 0.000 | NM_004566    |                 |
| GCHFR           | 1.6                   | 11.0             | 7.6             | 1742.5     | 61.7         | 28.0          | 0.000 | 2827.7     | 80.8         | 70.2          | 0.000 | NM_005258    |                 |
| KLHL15          | 1.6                   | 3.7              | 7.4             | 116.2      | 4.1          | 19.8          | 0.000 | 193.6      | 6.1          | 4.1           | 0.001 | NM_002644    |                 |
| C2orf169-DBNDD2 | 1.6                   | 3.7              | 7.4             | 754.7      | 28.3         | 73.5          | 0.000 | 1236.5     | 35.1         | 53.8          | 0.000 | NR_003189    |                 |
| DSCR8           | 1.6                   | 7.5              | 7.6             | 119.7      | 3.6          | 6.3           | 0.002 | 192.7      | 3.0          | 3.5           | 0.001 | NM_018982    |                 |
| DYNLL2          | 1.6                   | 3.2              | 7.5             | 919.4      | 32.8         | 12.0          | 0.000 | 1480.1     | 41.6         | 164.0         | 0.000 | NM_008677    |                 |
| TSPD            | 1.6                   | 4.9              | 7.4             | 265.3      | 94.0         | 11.8          | 0.000 | 822.9      | 45.7         | 10.0          | 0.000 | NM_000714    |                 |
| MPDU1           | 1.6                   | 3.4              | 6.8             | 532.7      | 25.6         | 25.6          | 0.000 | 800.0      | 16.8         | 68.2          | 0.000 | NM_004870    |                 |
| ONG1            | 1.6                   | 2.9              | 7.9             | 3067.1     | 79.1         | 256.0         | 0.000 | 4931.6     | 157.3        | 391.5         | 0.000 | NM_004128    |                 |
| KXRB            | 1.6                   | 4.1              | 6.9             | 242.6      | 12.1         | 12.1          | 0.000 | 389.9      | 13.6         | 12.6          | 0.000 | NM_005438    |                 |
| SSBP2           | 1.6                   | 4.9              | 7.8             | 234.0      | 25.9         | 28.5          | 0.000 | 471.1      | 12.9         | 7.8           | 0.000 | NM_012446    |                 |
| LQAL5B          | 1.6                   | 5.4              | 7.4             | 730.6      | 28.3         | 3.4           | 0.000 | 1164.8     | 30.2         | 76.3          | 0.000 | NM_002306    |                 |
| ZNRH1           | 1.6                   | 6.5              | 6.9             | 1218.4     | 54.3         | 95.0          | 0.000 | 1941.7     | 51.9         | 19.9          | 0.000 | NM_005438    |                 |
| RPS15           | 1.6                   | 3.2              | 6.9             | 1188.7     | 42.4         | 30.4          | 0.000 | 1887.4     | 58.2         | 188.9         | 0.000 | NM_001018    |                 |
| SPAG7           | 1.6                   | 3.7              | 7.5             | 373.7      | 15.6         | 53.2          | 0.000 | 591.4      | 13.4         | 5.0           | 0.000 | NM_004890    |                 |
| FIS1            | 1.6                   | 3.7              | 6.8             | 240.6      | 14.2         | 40.0          | 0.000 | 900.0      | 23.4         | 44.4          | 0.000 | NM_0         |                 |

|          |      |      |      |        |       |        |       |        |      |       |       |              |
|----------|------|------|------|--------|-------|--------|-------|--------|------|-------|-------|--------------|
| FRAS1    | -1.8 | 36.9 | 7.0  | 290.8  | 12.7  | 1.8    | 0.000 | 162.7  | 5.7  | 1.6   | 0.001 | NM_025074    |
| TNRC2B   | -1.8 | 15.1 | 8.6  | 382.9  | 13.4  | 3.6    | 0.000 | 213.1  | 6.3  | 7.7   | 0.001 | NM_001024843 |
| MTXK     | -1.8 | 6.5  | 8.1  | 1719.5 | 64.8  | 1117.9 | 0.000 | 951.7  | 30.3 | 1.0   | 0.000 | NM_005952    |
| VEZF1    | -1.8 | 5.4  | 6.9  | 2844.4 | 141.9 | 123.2  | 0.000 | 1564.3 | 43.1 | 114.5 | 0.000 | NM_007146    |
| JARID1B  | -1.8 | 2.5  | 6.7  | 720.5  | 36.5  | 84.1   | 0.000 | 393.2  | 12.7 | 45.4  | 0.000 | NM_006916    |
| RUTBC1   | -1.9 | 21.0 | 9.8  | 1270.3 | 40.0  | 15.4   | 0.000 | 686.2  | 19.7 | 12.4  | 0.000 | NM_014853    |
| INPPL1   | -1.9 | 12.8 | 9.3  | 1326.6 | 44.3  | 23.2   | 0.000 | 710.6  | 21.8 | 24.9  | 0.000 | NM_001567    |
| NEDD4L   | -1.9 | 15.1 | 7.9  | 382.9  | 16.3  | 1.1    | 0.000 | 204.9  | 6.3  | 10.7  | 0.001 | NM_015277    |
| FREQ     | -1.9 | 2.7  | 7.8  | 703.4  | 29.8  | 92.6   | 0.000 | 373.5  | 12.4 | 29.8  | 0.000 | NM_014286    |
| KPNA6    | -1.9 | 4.6  | 8.9  | 1317.8 | 46.0  | 44.7   | 0.000 | 694.3  | 24.3 | 90.7  | 0.000 | NM_012316    |
| KIAA152  | -1.9 | 6.3  | 7.6  | 4271.3 | 206.3 | 255.5  | 0.000 | 2222.9 | 63.7 | 71.8  | 0.000 | NM_014720    |
| TUC1     | -1.9 | 9.2  | 8.7  | 2079.2 | 84.3  | 103.4  | 0.000 | 1066.7 | 32.7 | 7.2   | 0.000 | NF_003323    |
| UBQLN2   | -2.0 | 4.2  | 7.7  | 943.0  | 45.1  | 82.6   | 0.000 | 479.1  | 15.2 | 28.1  | 0.000 | NM_013444    |
| C13orf23 | -2.0 | 8.3  | 8.9  | 647.5  | 27.1  | 30.2   | 0.000 | 325.9  | 9.1  | 8.6   | 0.000 | NM_170719    |
| DQUIN1D1 | -2.0 | 20.3 | 6.9  | 461.9  | 24.1  | 7.6    | 0.000 | 231.3  | 9.2  | 3.8   | 0.001 | NM_020640    |
| RAE22A   | -2.0 | 8.5  | 8.9  | 599.2  | 24.2  | 20.8   | 0.000 | 299.8  | 9.4  | 14.5  | 0.000 | NM_020673    |
| NASP     | -2.0 | 4.2  | 11.4 | 701.6  | 19.3  | 61.8   | 0.000 | 350.8  | 11.5 | 21.7  | 0.000 | NM_172164    |
| MTAP     | -2.0 | 15.8 | 9.6  | 397.4  | 14.8  | 2.4    | 0.000 | 197.4  | 5.9  | 10.3  | 0.001 | NM_002451    |
| PPARGC1A | -2.0 | 4.6  | 7.6  | 188.4  | 9.2   | 13.2   | 0.001 | 93.3   | 3.2  | 7.4   | 0.009 | NM_013261    |
| FSTL1    | -2.0 | 3.9  | 9.4  | 1331.7 | 52.6  | 86.7   | 0.000 | 657.2  | 19.5 | 88.4  | 0.000 | NM_007085    |
| HMGCS1   | -2.0 | 3.5  | 8.3  | 3473.2 | 157.2 | 121.4  | 0.000 | 1702.2 | 55.3 | 382.6 | 0.000 | NM_002130    |
| TSPAN17  | -2.1 | 9.0  | 10.1 | 2600.3 | 86.0  | 37.3   | 0.000 | 1266.1 | 45.8 | 110.5 | 0.000 | NM_012171    |
| PDZK1    | -2.1 | 5.9  | 9.3  | 362.0  | 14.2  | 4.7    | 0.000 | 175.1  | 6.0  | 27.1  | 0.001 | NM_002614    |
| LAMAS    | -2.1 | 2.7  | 13.1 | 4908.0 | 132.1 | 895.8  | 0.000 | 2326.8 | 64.5 | 64.5  | 0.000 | NM_005560    |
| TRIM6    | -2.2 | 7.7  | 9.5  | 429.2  | 18.6  | 14.1   | 0.000 | 191.5  | 6.3  | 16.9  | 0.001 | NM_001003818 |
| SCNN1A   | -2.3 | 2.7  | 11.9 | 1403.5 | 47.5  | 206.1  | 0.000 | 611.5  | 18.9 | 82.6  | 0.000 | NM_001038    |
| INSIG1   | -2.3 | 3.2  | 8.6  | 919.7  | 46.1  | 63.1   | 0.000 | 400.6  | 13.9 | 97.6  | 0.000 | NM_196337    |
| CD94     | -6.7 | 11.2 | 16.4 | 778.7  | 37.7  | 56.7   | 0.000 | 115.6  | 6.2  | 4.7   | 0.003 | NM_013220    |
